# Supplementary material
Source: PubMed Central journal article supplement (PMC8940652)
Supplement: NIHMS1780903-supplement-Supplementary_tables_and_figures.pdf [file NIHMS1780903-supplement-Supplementary_tables_and_figures.pdf]

## **Supplemental Materials**

Supplemental Tables 1 - 10

Supplemental Figures 1 - 6

| Composite ROI                        | Abbreviation |
|--------------------------------------|--------------|
| Cerebellar peduncles                 | CBP          |
| Corpus callosum                      | CC           |
| Corticospinal tract                  | CST          |
| Medial lemniscus                     | ML           |
| Cerebral peduncles                   | CP           |
| Internal capsule                     | IC           |
| Corona radiata                       | CR           |
| Sagittal striatum                    | SS           |
| External capsule                     | EC           |
| Cingulum                             | CING         |
| Stria terminalis                     | ST           |
| Superior longitudinal fasciculus     | SLF          |
| Superior fronto-occipital fasciculus | SFO          |
| Uncinate fasciculus                  | UF           |
| Medial longitudinal fasciculus       | MLF          |
| Posterior thalamic radiation         | PTR          |
| Anterior commissure                  | AC           |
| Fornix                               | FX           |

**Supplemental Table 1. Abbreviations for each of the composite 18 WM ROIs.** (From Aggarwal et al., 2021).

| ROI                                                  | Abbreviation |
|------------------------------------------------------|--------------|
| Middle Cerebellar Peduncle                           | MCP          |
| Genu of Corpus Callosum                              | GCC          |
| Body of Corpus Callosum                              | BCC          |
| Splenium of Corpus Callosum                          | SCC          |
| Fornix                                               | FX           |
| Corticospinal Tract - Right                          | CST-R        |
| Corticospinal Tract - Left                           | CST-L        |
| Medial Lemniscus - Right                             | ML-R         |
| Medial Lemniscus - Left                              | ML-L         |
| Inferior Cerebellar Peduncle - Right                 | ICP-R        |
| Inferior Cerebellar Peduncle - Left                  | ICP-L        |
| Superior Cerebellar Peduncle - Right                 | SCP-R        |
| Superior Cerebellar Peduncle - Left                  | SCP-L        |
| Cerebral Peduncle - Right                            | CP-R         |
| Cerebral Peduncle - Left                             | CP-L         |
| Anterior Limb of the Internal Capsule - Right        | ALIC-R       |
| Anterior Limb of the Internal Capsule - Left         | ALIC-L       |
| Posterior Limb of the Internal Capsule - Right       | PLIC-R       |
| Posterior Limb of the Internal Capsule - Left        | PLIC-L       |
| Retrolenticular Limb of the Internal Capsule - Right | RLIC-R       |
| Retrolenticular Limb of the Internal Capsule - Left  | RLIC-L       |
| Anterior Corona Radiata - Right                      | ACR-R        |
| Anterior Corona Radiata - Left                       | ACR-L        |
| Superior Corona Radiata - Right                      | SCR-R        |
| Superior Corona Radiata - Left                       | SCR-L        |
| Posterior Corona Radiata - Right                     | PCR-R        |
| Posterior Corona Radiata - Left                      | PCR-L        |
| Posterior Thalamic Radiation - Right                 | PTR-R        |
| Posterior Thalamic Radiation - Left                  | PTR-L        |
| Sagittal Striatum - Right                            | SS-R         |
| Sagittal Striatum - Left                             | SS-L         |
| External Capsule - Right                             | EC-R         |
| External Capsule - Left                              | EC-L         |
| Superior Cingulum - Right                            | CgC-R        |
| Superior Cingulum - Left                             | CgC-L        |
| Perihippocampal Cingulum - Right                     | CgH-R        |
| Perihippocampal Cingulum - Left                      | CgH-L        |
| Stria Terminalis - Right                             | ST-R         |
| Stria Terminalis - Left                              | ST-L         |
| Superior Longitudinal Fasciculus - Right             | SLF-R        |
| Superior Longitudinal Fasciculus - Left              | SLF-L        |
| Superior Fronto-Occipital Fasciculus - Right         | SFO-R        |
| Superior Fronto-Occipital Fasciculus - Left          | SFO-L        |
| Uncinate Fasciculus - Right                          | UF-R         |
| Uncinate Fasciculus - Left                           | UF-L         |
| Anterior Commissure                                  | AC           |
| Dorsal Posterior Corona Radiata - Right              | DPCR-R       |
| Dorsal Posterior Corona Radiata - Left               | DPCR-L       |
| Medial Longitudinal Fasciculus - Right               | MLF-R        |
| Medial Longitudinal Fasciculus - Left                | MLF-L        |
| Anterior Cingulum WM - Right                         | ACg-WM-R     |
| Anterior Cingulum WM - Left                          | ACg-WM-L     |

**Supplemental Table 2. Abbreviations for each of the 52 WM ROIs.** (From Aggarwal et al., 2021).

| <b>ROI</b>  | <b>Constituent ROIs</b> |
|-------------|-------------------------|
| <b>CBP</b>  | MCP                     |
|             | ICP-R                   |
|             | ICP-L                   |
|             | SCP-R                   |
|             | SCP-L                   |
| <b>CC</b>   | GCC                     |
|             | BCC                     |
|             | SCC                     |
| <b>CST</b>  | CST-R                   |
|             | CST-L                   |
| <b>ML</b>   | ML-R                    |
|             | ML-L                    |
| <b>CP</b>   | CP-R                    |
|             | CP-L                    |
| <b>IC</b>   | ALIC-R                  |
|             | ALIC-L                  |
|             | PLIC-R                  |
|             | PLIC-L                  |
|             | RLIC-R                  |
|             | RLIC-L                  |
| <b>CR</b>   | ACR-R                   |
|             | ACR-L                   |
|             | SCR-R                   |
|             | SCR-L                   |
|             | PCR-R                   |
|             | PCR-L                   |
|             | DPCR-R                  |
|             | DPCR-L                  |
| <b>SS</b>   | SS-R                    |
|             | SS-L                    |
| <b>EC</b>   | EC-R                    |
|             | EC-L                    |
| <b>CING</b> | CgC-R                   |
|             | CgC-L                   |
|             | CgH-R                   |
|             | CgH-L                   |
|             | ACg-WM-R                |
|             | ACg-WM-L                |
| <b>ST</b>   | ST-R                    |
|             | ST-L                    |
| <b>SLF</b>  | SLF-R                   |
|             | SLF-L                   |
| <b>SFO</b>  | SFO-R                   |
|             | SFO-L                   |
| <b>UF</b>   | UF-R                    |
|             | UF-L                    |
| <b>MLF</b>  | MLF-R                   |
|             | MLF-L                   |
| <b>PTR</b>  | PTR-R                   |
|             | PTR-L                   |
| <b>AC</b>   | AC                      |
| <b>FX</b>   | FX                      |

**Supplemental Table 3. Constituent ROIs for each of the 18 WM ROIs.** (From Aggarwal et al., 2021)

| Non-Linear qR <sub>1</sub> Age Trajectories in Global White Matter |                         |                                               |                           |                             |                              |
|--------------------------------------------------------------------|-------------------------|-----------------------------------------------|---------------------------|-----------------------------|------------------------------|
| Metric                                                             | $A(\text{GestAge}) + B$ | $A(\text{GestAge}^2) + B(\text{GestAge}) + C$ | $\ln(\text{GestAge}) + B$ | $A + Be^{C*\text{GestAge}}$ | $Ae^{Be^{C*\text{GestAge}}}$ |
| AIC                                                                | -3421.83                | -3638.60                                      | <b>-3657.11</b>           | -3627.64                    | -3222.02                     |
| BIC                                                                | -3415.52                | -3629.12                                      | <b>-3650.79</b>           | -3618.16                    | -3212.54                     |
| SSE                                                                | 4.90E-07                | 1.39E-07                                      | <b>1.49E-07</b>           | 1.48E-07                    | 1.53E-06                     |

**Supplemental Table 4. The proposed qR<sub>1</sub> trajectory models in global white matter (GWM).** Akaike Information Criterion (AIC), Bayesian Information Criterion (BIC), and Sum of Squared Error (SSE) values are shown. The metrics with the lowest values are bolded, indicating that the logarithmic model provides the best fit.

| ROI  | Intercept | GestAge  | P-value          | Sex      | P-value | GestAge:Sex | P-value |
|------|-----------|----------|------------------|----------|---------|-------------|---------|
| FX   | 7.91E-04  | 1.27E-04 | <b>&lt;0.001</b> | 1.25E-05 | 0.218   | 5.95E-06    | 0.640   |
| AC   | 9.51E-04  | 2.58E-04 | <b>&lt;0.001</b> | 4.19E-06 | 0.700   | -1.57E-06   | 0.957   |
| CBP  | 1.11E-03  | 1.60E-04 | <b>&lt;0.001</b> | 6.90E-06 | 0.287   | -1.13E-05   | 0.423   |
| CC   | 9.86E-04  | 3.38E-04 | <b>&lt;0.001</b> | 1.19E-05 | 0.301   | -4.66E-06   | 0.878   |
| CST  | 1.10E-03  | 2.20E-04 | <b>&lt;0.001</b> | 1.09E-05 | 0.170   | -3.77E-06   | 0.850   |
| ML   | 1.04E-03  | 1.87E-04 | <b>&lt;0.001</b> | 4.67E-06 | 0.566   | -5.38E-06   | 0.731   |
| CP   | 1.09E-03  | 1.81E-04 | <b>&lt;0.001</b> | 4.93E-06 | 0.642   | -5.69E-06   | 0.786   |
| IC   | 1.07E-03  | 2.45E-04 | <b>&lt;0.001</b> | 7.62E-06 | 0.426   | -2.84E-06   | 0.900   |
| CR   | 9.90E-04  | 2.75E-04 | <b>&lt;0.001</b> | 7.78E-06 | 0.343   | -3.01E-06   | 0.890   |
| SS   | 1.01E-03  | 2.78E-04 | <b>&lt;0.001</b> | 1.46E-05 | 0.112   | -1.91E-07   | 0.994   |
| EC   | 8.68E-04  | 2.02E-04 | <b>&lt;0.001</b> | 9.80E-06 | 0.135   | 2.39E-06    | 0.885   |
| CING | 7.94E-04  | 1.28E-04 | <b>&lt;0.001</b> | 4.82E-06 | 0.305   | 3.35E-06    | 0.753   |
| ST   | 9.81E-04  | 1.73E-04 | <b>&lt;0.001</b> | 4.12E-06 | 0.585   | -5.63E-06   | 0.748   |
| SLF  | 9.91E-04  | 2.79E-04 | <b>&lt;0.001</b> | 1.15E-05 | 0.181   | 9.12E-07    | 0.968   |
| SFO  | 9.91E-04  | 2.01E-04 | <b>&lt;0.001</b> | 8.15E-06 | 0.275   | 3.90E-06    | 0.828   |
| UF   | 7.55E-04  | 1.47E-04 | <b>&lt;0.001</b> | 4.83E-06 | 0.312   | 3.24E-06    | 0.778   |
| MLF  | 1.00E-03  | 1.47E-04 | <b>&lt;0.001</b> | 5.78E-07 | 0.933   | -3.37E-06   | 0.807   |
| PTR  | 1.11E-03  | 3.49E-04 | <b>&lt;0.001</b> | 3.53E-06 | 0.745   | -6.86E-06   | 0.805   |

**Supplemental Table 5. Model parameters for logarithmic modeling of qR<sub>1</sub> in 18 WM ROIs.**

Models control for Sex and the interaction between GestAge and Sex. Note that GestAge is significant in all 18 models after Bonferroni correction.

| ROI  | Gestational Age at Scan partial-R <sup>2</sup> | Cohen's f <sup>2</sup> |
|------|------------------------------------------------|------------------------|
| FX   | 0.685                                          | 2.175                  |
| AC   | 0.683                                          | 2.155                  |
| CBP  | 0.764                                          | 3.237                  |
| CC   | 0.770                                          | 3.348                  |
| CST  | 0.763                                          | 3.219                  |
| ML   | 0.775                                          | 3.444                  |
| CP   | 0.641                                          | 1.786                  |
| IC   | 0.754                                          | 3.065                  |
| CR   | 0.814                                          | 4.376                  |
| SS   | 0.786                                          | 3.673                  |
| EC   | 0.799                                          | 3.975                  |
| CING | 0.785                                          | 3.651                  |
| ST   | 0.714                                          | 2.497                  |
| SLF  | 0.806                                          | 4.155                  |
| SFO  | 0.768                                          | 3.310                  |
| UF   | 0.810                                          | 4.263                  |
| MLF  | 0.733                                          | 2.745                  |
| PTR  | 0.808                                          | 4.208                  |

**Supplemental Table 6. Effect sizes for ln(GestAge) term in the primary logarithmic model (partial-R<sup>2</sup> and Cohen's f<sup>2</sup>) in 18 WM ROIs.** Data correspond to model detailed in Supplemental Table 5. As noted in Supplemental Table 5, GestAge is significant in all 18 models after Bonferroni correction.

| FA ~ qR <sub>1</sub> |                |         |                |         |                |         |                |         |                |         |
|----------------------|----------------|---------|----------------|---------|----------------|---------|----------------|---------|----------------|---------|
|                      | 3 weeks        |         | 7 weeks        |         | 13 weeks       |         | 25 weeks       |         | 53 weeks       |         |
| ROI                  | R <sup>2</sup> | P-value |
| <b>FX</b>            | 0.021          | 0.417   | 0.029          | 0.346   | 0.101          | 0.071   | 0.051          | 0.213   | 0.067          | 0.147   |
| <b>AC</b>            | 0.007          | 0.636   | 0.019          | 0.438   | 0.058          | 0.177   | <b>0.297</b>   | 0.001   | <b>0.276</b>   | 0.002   |
| <b>CBP</b>           | 0.085          | 0.099   | 0.008          | 0.611   | 0.001          | 0.856   | 0.017          | 0.479   | 0.001          | 0.866   |
| <b>CC</b>            | 0.144          | 0.030   | 0.084          | 0.101   | 0.124          | 0.045   | 0.116          | 0.057   | 0.039          | 0.271   |
| <b>CST</b>           | 0.109          | 0.060   | 0.007          | 0.652   | 0.011          | 0.559   | 0.104          | 0.072   | 0.000          | 0.954   |
| <b>ML</b>            | 0.068          | 0.143   | 0.014          | 0.509   | 0.003          | 0.772   | 0.085          | 0.105   | 0.054          | 0.195   |
| <b>CP</b>            | 0.083          | 0.103   | 0.047          | 0.228   | 0.060          | 0.169   | 0.113          | 0.060   | 0.053          | 0.199   |
| <b>IC</b>            | 0.180          | 0.014   | 0.135          | 0.035   | 0.188          | 0.012   | 0.139          | 0.036   | 0.011          | 0.570   |
| <b>CR</b>            | <b>0.286</b>   | 0.001   | 0.091          | 0.089   | 0.137          | 0.034   | 0.076          | 0.126   | 0.019          | 0.445   |
| <b>SS</b>            | 0.137          | 0.034   | 0.152          | 0.025   | 0.200          | 0.009   | 0.216          | 0.007   | 0.018          | 0.451   |
| <b>EC</b>            | 0.099          | 0.074   | 0.150          | 0.026   | 0.073          | 0.130   | 0.008          | 0.617   | 0.031          | 0.324   |
| <b>CING</b>          | 0.003          | 0.764   | 0.042          | 0.252   | 0.164          | 0.020   | 0.076          | 0.126   | 0.110          | 0.059   |
| <b>ST</b>            | 0.010          | 0.571   | 0.029          | 0.347   | 0.010          | 0.588   | 0.094          | 0.087   | 0.003          | 0.781   |
| <b>SLF</b>           | 0.229          | 0.005   | 0.082          | 0.105   | 0.222          | 0.006   | 0.180          | 0.016   | 0.067          | 0.147   |
| <b>SFO</b>           | 0.078          | 0.115   | 0.094          | 0.082   | 0.121          | 0.048   | 0.039          | 0.276   | 0.000          | 0.969   |
| <b>UF</b>            | 0.002          | 0.796   | 0.088          | 0.093   | 0.154          | 0.024   | 0.159          | 0.024   | 0.022          | 0.412   |
| <b>MLF</b>           | 0.049          | 0.216   | 0.002          | 0.819   | 0.067          | 0.145   | 0.156          | 0.025   | 0.009          | 0.599   |
| <b>PTR</b>           | 0.174          | 0.016   | 0.040          | 0.267   | 0.117          | 0.051   | 0.109          | 0.066   | 0.113          | 0.056   |

| MD ~ qR <sub>1</sub> |                |         |                |         |                |         |                |         |                |         |
|----------------------|----------------|---------|----------------|---------|----------------|---------|----------------|---------|----------------|---------|
|                      | 3 weeks        |         | 7 weeks        |         | 13 weeks       |         | 25 weeks       |         | 53 weeks       |         |
| ROI                  | R <sup>2</sup> | P-value |
| <b>FX</b>            | 0.200          | 0.009   | <b>0.280</b>   | 0.002   | <b>0.511</b>   | <0.001  | <b>0.278</b>   | 0.002   | <b>0.467</b>   | <0.001  |
| <b>AC</b>            | 0.001          | 0.888   | 0.061          | 0.167   | 0.021          | 0.416   | 0.095          | 0.086   | 0.106          | 0.064   |
| <b>CBP</b>           | 0.074          | 0.125   | 0.024          | 0.388   | 0.001          | 0.897   | 0.107          | 0.068   | 0.006          | 0.669   |
| <b>CC</b>            | <b>0.318</b>   | 0.001   | 0.208          | 0.008   | 0.162          | 0.020   | <b>0.347</b>   | <0.001  | 0.232          | 0.005   |
| <b>CST</b>           | 0.003          | 0.744   | 0.086          | 0.097   | 0.023          | 0.395   | 0.000          | 0.945   | 0.092          | 0.085   |
| <b>ML</b>            | 0.001          | 0.896   | 0.008          | 0.612   | 0.000          | 0.968   | 0.037          | 0.293   | 0.107          | 0.064   |
| <b>CP</b>            | 0.085          | 0.100   | 0.125          | 0.044   | 0.036          | 0.288   | 0.158          | 0.024   | 0.000          | 0.935   |
| <b>IC</b>            | 0.101          | 0.072   | 0.086          | 0.098   | 0.012          | 0.542   | 0.073          | 0.134   | 0.008          | 0.628   |
| <b>CR</b>            | <b>0.358</b>   | <0.001  | 0.188          | 0.012   | 0.095          | 0.081   | 0.078          | 0.121   | 0.083          | 0.104   |
| <b>SS</b>            | 0.103          | 0.069   | 0.218          | 0.006   | 0.113          | 0.056   | 0.105          | 0.071   | 0.025          | 0.380   |
| <b>EC</b>            | 0.152          | 0.025   | 0.141          | 0.031   | 0.099          | 0.074   | 0.146          | 0.031   | 0.024          | 0.390   |
| <b>CING</b>          | 0.055          | 0.190   | 0.052          | 0.202   | 0.031          | 0.327   | 0.015          | 0.508   | 0.060          | 0.168   |
| <b>ST</b>            | 0.093          | 0.085   | 0.124          | 0.044   | 0.000          | 0.920   | 0.218          | 0.007   | 0.007          | 0.649   |
| <b>SLF</b>           | <b>0.280</b>   | 0.002   | 0.237          | 0.004   | 0.089          | 0.092   | 0.074          | 0.132   | 0.119          | 0.049   |
| <b>SFO</b>           | 0.091          | 0.087   | 0.104          | 0.067   | 0.069          | 0.140   | 0.094          | 0.088   | 0.005          | 0.710   |
| <b>UF</b>            | <b>0.286</b>   | 0.001   | 0.190          | 0.011   | 0.008          | 0.632   | <b>0.285</b>   | 0.002   | 0.065          | 0.151   |
| <b>MLF</b>           | 0.118          | 0.051   | 0.003          | 0.744   | 0.038          | 0.279   | 0.122          | 0.050   | 0.002          | 0.827   |
| <b>PTR</b>           | 0.247          | 0.003   | 0.171          | 0.017   | 0.011          | 0.566   | 0.009          | 0.608   | 0.010          | 0.574   |

| RD ~ qR <sub>1</sub> |                |         |                |         |                |         |                |         |                |         |
|----------------------|----------------|---------|----------------|---------|----------------|---------|----------------|---------|----------------|---------|
|                      | 3 weeks        |         | 7 weeks        |         | 13 weeks       |         | 25 weeks       |         | 53 weeks       |         |
| ROI                  | R <sup>2</sup> | P-value |
| FX                   | 0.165          | 0.019   | 0.251          | 0.003   | <b>0.525</b>   | <0.001  | <b>0.277</b>   | 0.002   | <b>0.428</b>   | <0.001  |
| AC                   | 0.003          | 0.753   | 0.001          | 0.901   | 0.053          | 0.198   | <b>0.282</b>   | 0.002   | 0.249          | 0.003   |
| CBP                  | 0.100          | 0.073   | 0.019          | 0.446   | 0.000          | 0.931   | 0.069          | 0.146   | 0.004          | 0.726   |
| CC                   | <b>0.319</b>   | 0.001   | 0.219          | 0.006   | 0.184          | 0.013   | <b>0.306</b>   | 0.001   | 0.175          | 0.016   |
| CST                  | 0.014          | 0.516   | 0.057          | 0.179   | 0.024          | 0.389   | 0.021          | 0.428   | 0.058          | 0.179   |
| ML                   | 0.007          | 0.655   | 0.003          | 0.752   | 0.003          | 0.749   | 0.088          | 0.100   | 0.137          | 0.034   |
| CP                   | 0.126          | 0.043   | 0.132          | 0.038   | 0.073          | 0.127   | 0.169          | 0.019   | 0.018          | 0.451   |
| IC                   | 0.176          | 0.015   | 0.146          | 0.028   | 0.083          | 0.104   | 0.118          | 0.054   | 0.011          | 0.556   |
| CR                   | <b>0.440</b>   | <0.001  | 0.212          | 0.007   | 0.149          | 0.027   | 0.089          | 0.098   | 0.067          | 0.147   |
| SS                   | 0.173          | 0.016   | <b>0.290</b>   | 0.001   | 0.219          | 0.006   | 0.177          | 0.017   | 0.030          | 0.335   |
| EC                   | 0.179          | 0.014   | 0.191          | 0.011   | 0.146          | 0.028   | 0.109          | 0.066   | 0.006          | 0.662   |
| CING                 | 0.042          | 0.251   | 0.067          | 0.147   | 0.085          | 0.101   | 0.048          | 0.228   | 0.103          | 0.069   |
| ST                   | 0.098          | 0.075   | 0.176          | 0.015   | 0.004          | 0.728   | <b>0.272</b>   | 0.002   | 0.004          | 0.712   |
| SLF                  | <b>0.365</b>   | <0.001  | <b>0.291</b>   | 0.001   | 0.189          | 0.012   | 0.124          | 0.048   | 0.122          | 0.047   |
| SFO                  | 0.110          | 0.060   | 0.132          | 0.037   | 0.088          | 0.093   | 0.076          | 0.127   | 0.001          | 0.893   |
| UF                   | <b>0.265</b>   | 0.002   | <b>0.295</b>   | 0.001   | 0.076          | 0.120   | <b>0.377</b>   | <0.001  | 0.048          | 0.221   |
| MLF                  | 0.116          | 0.052   | 0.002          | 0.789   | 0.008          | 0.614   | 0.169          | 0.019   | 0.000          | 0.981   |
| PTR                  | <b>0.364</b>   | <0.001  | 0.188          | 0.012   | 0.047          | 0.224   | 0.045          | 0.241   | 0.047          | 0.223   |
| AD ~ qR <sub>1</sub> |                |         |                |         |                |         |                |         |                |         |
|                      | 3 weeks        |         | 7 weeks        |         | 13 weeks       |         | 25 weeks       |         | 53 weeks       |         |
| ROI                  | R <sup>2</sup> | P-value |
| FX                   | 0.213          | 0.007   | <b>0.271</b>   | 0.002   | <b>0.396</b>   | <0.001  | <b>0.294</b>   | 0.001   | 0.240          | 0.004   |
| AC                   | 0.018          | 0.454   | 0.092          | 0.086   | 0.024          | 0.386   | 0.239          | 0.005   | 0.210          | 0.007   |
| CBP                  | 0.021          | 0.426   | 0.020          | 0.436   | 0.001          | 0.872   | 0.018          | 0.469   | 0.002          | 0.785   |
| CC                   | 0.235          | 0.004   | 0.137          | 0.034   | 0.071          | 0.134   | 0.202          | 0.010   | 0.240          | 0.004   |
| CST                  | 0.002          | 0.784   | 0.108          | 0.062   | 0.010          | 0.580   | 0.004          | 0.717   | 0.025          | 0.375   |
| ML                   | 0.005          | 0.701   | 0.012          | 0.538   | 0.003          | 0.766   | 0.002          | 0.799   | 0.001          | 0.843   |
| CP                   | 0.018          | 0.452   | 0.067          | 0.147   | 0.000          | 0.967   | 0.043          | 0.257   | 0.057          | 0.183   |
| IC                   | 0.011          | 0.567   | 0.011          | 0.564   | 0.028          | 0.354   | 0.045          | 0.243   | 0.000          | 0.947   |
| CR                   | 0.172          | 0.017   | 0.107          | 0.063   | 0.013          | 0.524   | 0.009          | 0.613   | 0.073          | 0.129   |
| SS                   | 0.023          | 0.401   | 0.081          | 0.108   | 0.017          | 0.474   | 0.020          | 0.435   | 0.009          | 0.607   |
| EC                   | 0.097          | 0.077   | 0.064          | 0.155   | 0.024          | 0.388   | 0.008          | 0.636   | 0.062          | 0.163   |
| CING                 | 0.068          | 0.144   | 0.021          | 0.421   | 0.004          | 0.735   | 0.002          | 0.802   | 0.001          | 0.867   |
| ST                   | 0.067          | 0.145   | 0.062          | 0.164   | 0.000          | 0.902   | 0.000          | 0.922   | 0.003          | 0.771   |
| SLF                  | 0.110          | 0.059   | 0.103          | 0.068   | 0.000          | 0.972   | 0.000          | 0.913   | 0.041          | 0.257   |
| SFO                  | 0.046          | 0.233   | 0.034          | 0.302   | 0.013          | 0.533   | 0.006          | 0.664   | 0.018          | 0.454   |
| UF                   | 0.176          | 0.015   | 0.036          | 0.291   | 0.014          | 0.506   | 0.008          | 0.626   | 0.017          | 0.473   |
| MLF                  | 0.109          | 0.061   | 0.005          | 0.692   | 0.104          | 0.067   | 0.007          | 0.643   | 0.001          | 0.859   |
| PTR                  | 0.098          | 0.077   | 0.105          | 0.066   | 0.001          | 0.852   | 0.012          | 0.548   | 0.006          | 0.674   |

Supplemental Table 7. R<sup>2</sup> values for between-subject (timepoint-specific) correlations between qR<sub>1</sub> vs. FA, MD, RD, and AD extracted from 18 WM ROIs. Significant R<sup>2</sup> values ( $P_{\text{corrected}} < 0.05$ ) are bolded.

| ROI  | 3 weeks        |         | 7 weeks        |         | 13 weeks       |         | 25 weeks       |         | 53 weeks       |         |
|------|----------------|---------|----------------|---------|----------------|---------|----------------|---------|----------------|---------|
|      | R <sup>2</sup> | P-value |
| FX   | <i>0.354</i>   | 0.004   | <i>0.164</i>   | 0.037   | 0.183          | 0.088   | 0.238          | 0.164   | 0.207          | 0.051   |
| AC   | <b>0.443</b>   | <0.001  | <i>0.181</i>   | 0.016   | 0.160          | 0.064   | 0.164          | 0.052   | 0.059          | 0.184   |
| CBP  | <b>0.527</b>   | <0.001  | 0.133          | 0.147   | 0.160          | 0.301   | <i>0.171</i>   | 0.049   | 0.048          | 0.296   |
| CC   | <b>0.682</b>   | <0.001  | <b>0.295</b>   | 0.001   | <i>0.238</i>   | 0.027   | 0.257          | 0.055   | 0.084          | 0.139   |
| CST  | <b>0.485</b>   | <0.001  | 0.114          | 0.108   | 0.098          | 0.271   | <i>0.181</i>   | 0.042   | 0.109          | 0.299   |
| ML   | <i>0.298</i>   | 0.003   | 0.100          | 0.110   | 0.096          | 0.195   | 0.116          | 0.109   | 0.025          | 0.477   |
| CP   | <b>0.365</b>   | 0.001   | 0.085          | 0.113   | 0.096          | 0.313   | 0.232          | 0.132   | 0.044          | 0.302   |
| IC   | <b>0.584</b>   | <0.001  | <i>0.184</i>   | 0.015   | 0.161          | 0.105   | 0.192          | 0.068   | 0.070          | 0.234   |
| CR   | <b>0.636</b>   | <0.001  | <i>0.189</i>   | 0.013   | <i>0.164</i>   | 0.044   | <i>0.252</i>   | 0.021   | 0.068          | 0.243   |
| SS   | <b>0.541</b>   | <0.001  | <i>0.210</i>   | 0.017   | 0.213          | 0.374   | 0.256          | 0.232   | 0.056          | 0.436   |
| EC   | <b>0.589</b>   | <0.001  | <i>0.232</i>   | 0.006   | <i>0.252</i>   | 0.026   | <i>0.286</i>   | 0.018   | 0.134          | 0.096   |
| CING | <b>0.473</b>   | <0.001  | <i>0.216</i>   | 0.008   | 0.121          | 0.545   | <i>0.254</i>   | 0.032   | 0.099          | 0.196   |
| ST   | <b>0.590</b>   | <0.001  | <i>0.205</i>   | 0.010   | 0.115          | 0.207   | 0.174          | 0.135   | 0.057          | 0.264   |
| SLF  | <b>0.683</b>   | <0.001  | <i>0.257</i>   | 0.003   | <i>0.206</i>   | 0.026   | <i>0.251</i>   | 0.050   | 0.132          | 0.192   |
| SFO  | <b>0.455</b>   | <0.001  | 0.084          | 0.107   | 0.160          | 0.079   | <i>0.229</i>   | 0.049   | 0.070          | 0.702   |
| UF   | <b>0.431</b>   | <0.001  | <i>0.247</i>   | 0.006   | <i>0.271</i>   | 0.026   | <i>0.283</i>   | 0.016   | 0.117          | 0.071   |
| MLF  | <i>0.239</i>   | 0.007   | 0.115          | 0.150   | 0.092          | 0.173   | 0.071          | 0.935   | 0.005          | 0.787   |
| PTR  | <b>0.563</b>   | <0.001  | <i>0.208</i>   | 0.009   | 0.133          | 0.211   | 0.087          | 0.493   | 0.060          | 0.550   |

**Supplemental Table 8. R<sup>2</sup> values for correlations between gestational age at birth (time *in utero*) and qR<sub>1</sub> at 3, 7, 13, 25, and 53 weeks of age extracted from 18 WM ROIs. R<sup>2</sup> values significant at the uncorrected level ( $P_{\text{uncorrected}} < 0.05$ ) are italicized. R<sup>2</sup> values significant at the Bonferroni-corrected level ( $P_{\text{corrected}} < 0.05$ ) are bolded.**

| ROI  | 3 weeks                    |                        | 7 weeks                    |                        | 13 weeks                   |                        | 25 weeks                   |                        | 53 weeks                   |                        |
|------|----------------------------|------------------------|----------------------------|------------------------|----------------------------|------------------------|----------------------------|------------------------|----------------------------|------------------------|
|      | GAB partial-R <sup>2</sup> | Cohen's f <sup>2</sup> |
| FX   | 0.242                      | 0.320                  | 0.137                      | 0.159                  | 0.094                      | 0.104                  | 0.066                      | 0.070                  | 0.121                      | 0.138                  |
| AC   | 0.341                      | 0.518                  | 0.179                      | 0.218                  | 0.110                      | 0.124                  | 0.124                      | 0.142                  | 0.058                      | 0.062                  |
| CBP  | 0.457                      | 0.843                  | 0.069                      | 0.074                  | 0.036                      | 0.037                  | 0.127                      | 0.146                  | 0.036                      | 0.038                  |
| CC   | 0.531                      | 1.131                  | 0.293                      | 0.414                  | 0.154                      | 0.181                  | 0.121                      | 0.138                  | 0.072                      | 0.077                  |
| CST  | 0.366                      | 0.577                  | 0.084                      | 0.092                  | 0.040                      | 0.042                  | 0.135                      | 0.156                  | 0.036                      | 0.037                  |
| ML   | 0.260                      | 0.351                  | 0.083                      | 0.091                  | 0.055                      | 0.059                  | 0.086                      | 0.094                  | 0.017                      | 0.017                  |
| CP   | 0.307                      | 0.443                  | 0.082                      | 0.089                  | 0.034                      | 0.035                  | 0.076                      | 0.083                  | 0.035                      | 0.037                  |
| IC   | 0.489                      | 0.957                  | 0.183                      | 0.224                  | 0.085                      | 0.093                  | 0.111                      | 0.124                  | 0.047                      | 0.049                  |
| CR   | 0.485                      | 0.942                  | 0.189                      | 0.232                  | 0.129                      | 0.148                  | 0.171                      | 0.206                  | 0.045                      | 0.047                  |
| SS   | 0.389                      | 0.637                  | 0.176                      | 0.213                  | 0.026                      | 0.027                  | 0.049                      | 0.051                  | 0.020                      | 0.021                  |
| EC   | 0.444                      | 0.797                  | 0.229                      | 0.297                  | 0.154                      | 0.183                  | 0.178                      | 0.217                  | 0.090                      | 0.098                  |
| CING | 0.402                      | 0.671                  | 0.213                      | 0.271                  | 0.012                      | 0.012                  | 0.150                      | 0.176                  | 0.055                      | 0.058                  |
| ST   | 0.509                      | 1.037                  | 0.201                      | 0.252                  | 0.052                      | 0.055                  | 0.075                      | 0.081                  | 0.041                      | 0.043                  |
| SLF  | 0.542                      | 1.182                  | 0.251                      | 0.336                  | 0.155                      | 0.183                  | 0.126                      | 0.145                  | 0.056                      | 0.060                  |
| SFO  | 0.342                      | 0.520                  | 0.084                      | 0.092                  | 0.099                      | 0.110                  | 0.127                      | 0.146                  | 0.005                      | 0.005                  |
| UF   | 0.398                      | 0.662                  | 0.227                      | 0.294                  | 0.156                      | 0.184                  | 0.185                      | 0.227                  | 0.104                      | 0.117                  |
| MLF  | 0.220                      | 0.283                  | 0.068                      | 0.073                  | 0.061                      | 0.065                  | 0.000                      | 0.000                  | 0.002                      | 0.002                  |
| PTR  | 0.452                      | 0.825                  | 0.205                      | 0.258                  | 0.052                      | 0.054                  | 0.016                      | 0.017                  | 0.012                      | 0.012                  |

**Supplemental Table 9. Effect sizes for Gestational Age at Birth (GAB) term (partial-R<sup>2</sup> and Cohen's f<sup>2</sup>) in all 18 WM ROIs. Data correspond to analyses detailed in Supplemental Table 8, including corresponding P-values.**

| ROI         | MD             |         | RD             |         | AD             |         |
|-------------|----------------|---------|----------------|---------|----------------|---------|
|             | R <sup>2</sup> | P-value | R <sup>2</sup> | P-value | R <sup>2</sup> | P-value |
| <b>FX</b>   | 0.032          | 0.700   | 0.057          | 0.935   | 0.126          | 0.352   |
| <b>AC</b>   | 0.169          | 0.260   | 0.245          | 0.112   | 0.044          | 0.496   |
| <b>CBP</b>  | 0.280          | 0.839   | 0.391          | 0.547   | 0.084          | 0.648   |
| <b>CC</b>   | 0.128          | 0.444   | 0.186          | 0.436   | 0.047          | 0.514   |
| <b>CST</b>  | 0.343          | 0.100   | 0.373          | 0.116   | 0.248          | 0.111   |
| <b>ML</b>   | 0.220          | 0.534   | 0.291          | 0.592   | 0.092          | 0.501   |
| <b>CP</b>   | 0.291          | 0.648   | 0.380          | 0.391   | 0.110          | 0.855   |
| <b>IC</b>   | 0.200          | 0.047   | 0.323          | 0.020   | 0.036          | 0.301   |
| <b>CR</b>   | 0.331          | 0.011   | 0.378          | 0.012   | 0.207          | 0.022   |
| <b>SS</b>   | 0.152          | 0.182   | 0.276          | 0.150   | 0.040          | 0.300   |
| <b>EC</b>   | 0.170          | 0.135   | 0.228          | 0.128   | 0.093          | 0.175   |
| <b>CING</b> | 0.249          | 0.526   | 0.280          | 0.674   | 0.158          | 0.335   |
| <b>ST</b>   | 0.154          | 0.269   | 0.267          | 0.146   | 0.039          | 0.572   |
| <b>SLF</b>  | 0.310          | 0.017   | 0.408          | 0.011   | 0.133          | 0.067   |
| <b>SFO</b>  | 0.222          | 0.087   | 0.257          | 0.070   | 0.123          | 0.192   |
| <b>UF</b>   | 0.037          | 0.336   | 0.107          | 0.456   | 0.126          | 0.314   |
| <b>MLF</b>  | 0.201          | 0.757   | 0.210          | 0.699   | 0.182          | 0.869   |
| <b>PTR</b>  | 0.032          | 0.581   | 0.087          | 0.311   | 0.001          | 0.945   |

**Supplemental Table 10. R<sup>2</sup> values for correlations between gestational age at birth (i.e., time *in utero*) and MD, RD, and AD at 3 weeks of age extracted from 18 WM ROIs, along with corresponding P-values. No R<sup>2</sup> values were significant after Bonferroni-correction ( $P_{\text{corrected}} < 0.05$ ).**



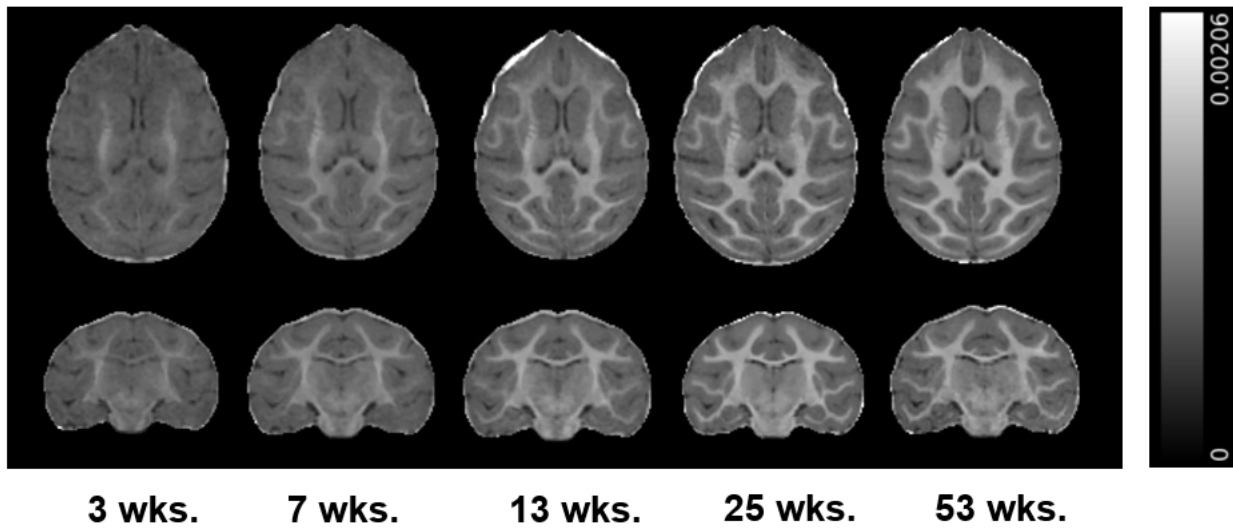

**Supplemental Figure 1. Axial (top) and coronal (bottom) views of a  $qR_1$  map ( $ms^{-1}$ ) for an infant female rhesus monkey at each age in population template space. Note the increasing contrast and complexity of the WM over the first year of life, especially in the frontal lobes.**

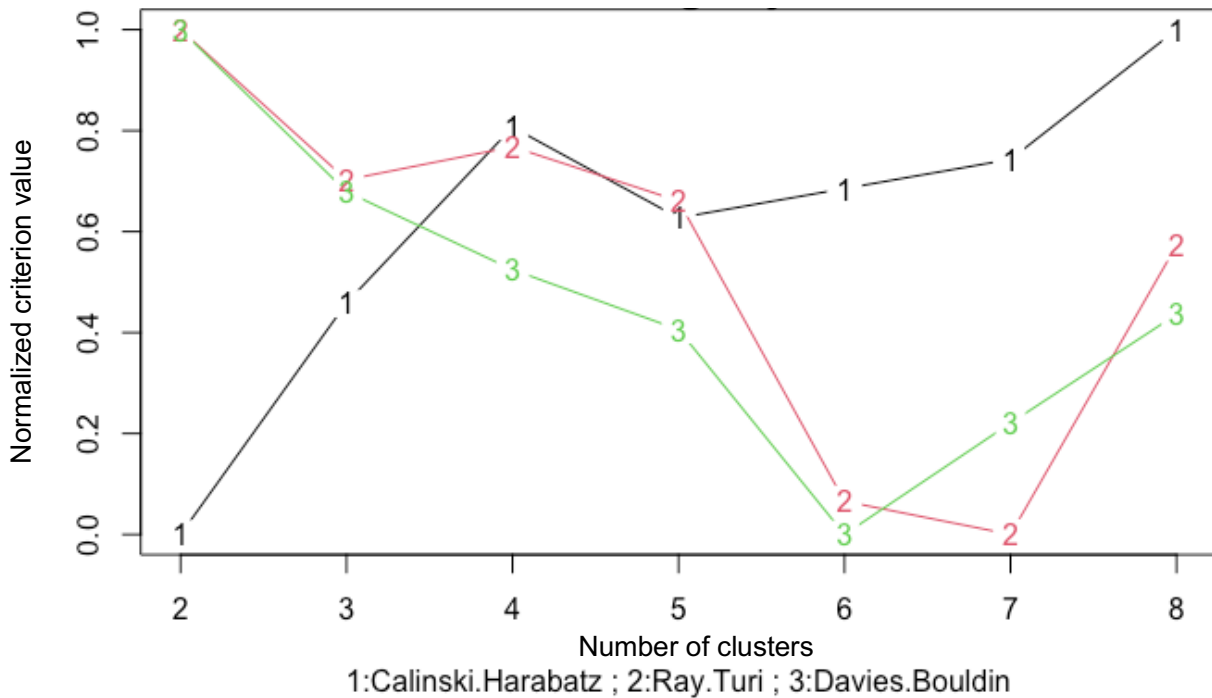

**Supplemental Figure 2. Plot of normalized k-means clustering criteria for 1 through 8 possible clusters of raw  $qR_1$  trajectories.** The black curve (1) represents the Calinski-Harabatz index for each number of clusters; red (2) is the Ray-Turi index; green (3) is the Davies-Bouldin index. Calinski-Harabatz and Ray-Turi indices decline considerably with greater than 4 clusters. Additionally, the Davies-Bouldin index drops sharply with more than 4-5 clusters. Together, they suggest 4 clusters as a reasonable partition of the data. Note that all metrics have been normalized between 0 and 1 to allow for direct comparison, where higher values indicate better separation between clusters.

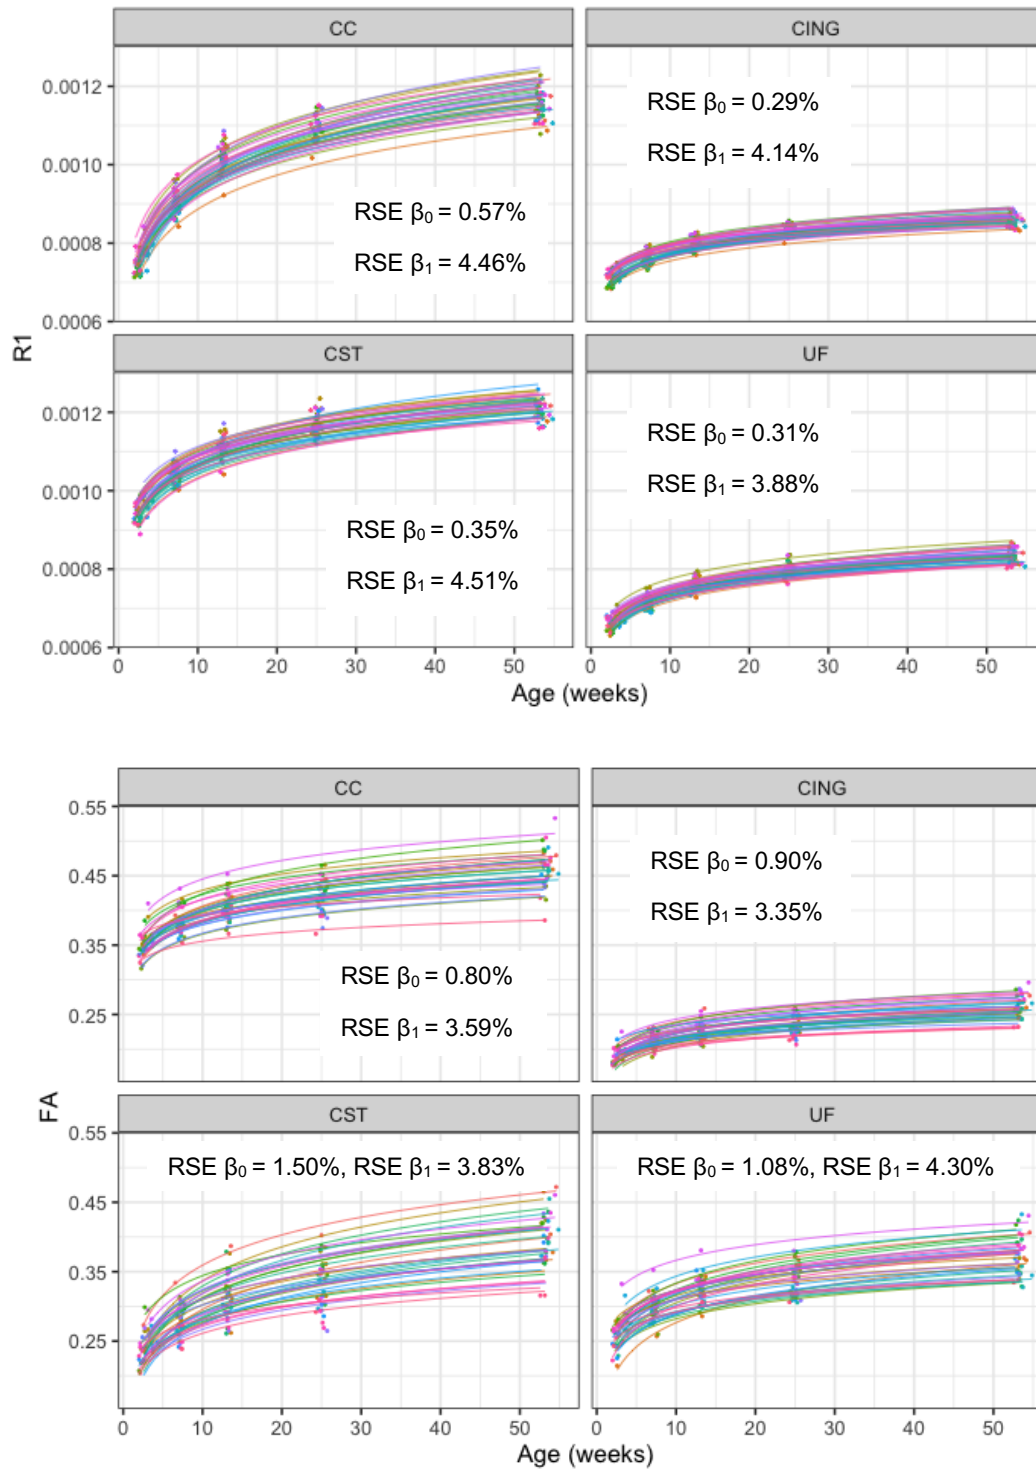

**Supplemental Figure 3. Individual-level  $qR_1$  (top) and FA (bottom) trajectories extracted from 4 WM ROIs.** In each panel, each line represents the logarithmic trajectory of a single subject for the given ROI. Corresponding relative standard errors (RSE) of LME model parameters ( $\beta_0$  and  $\beta_1$ ) are listed in each panel.

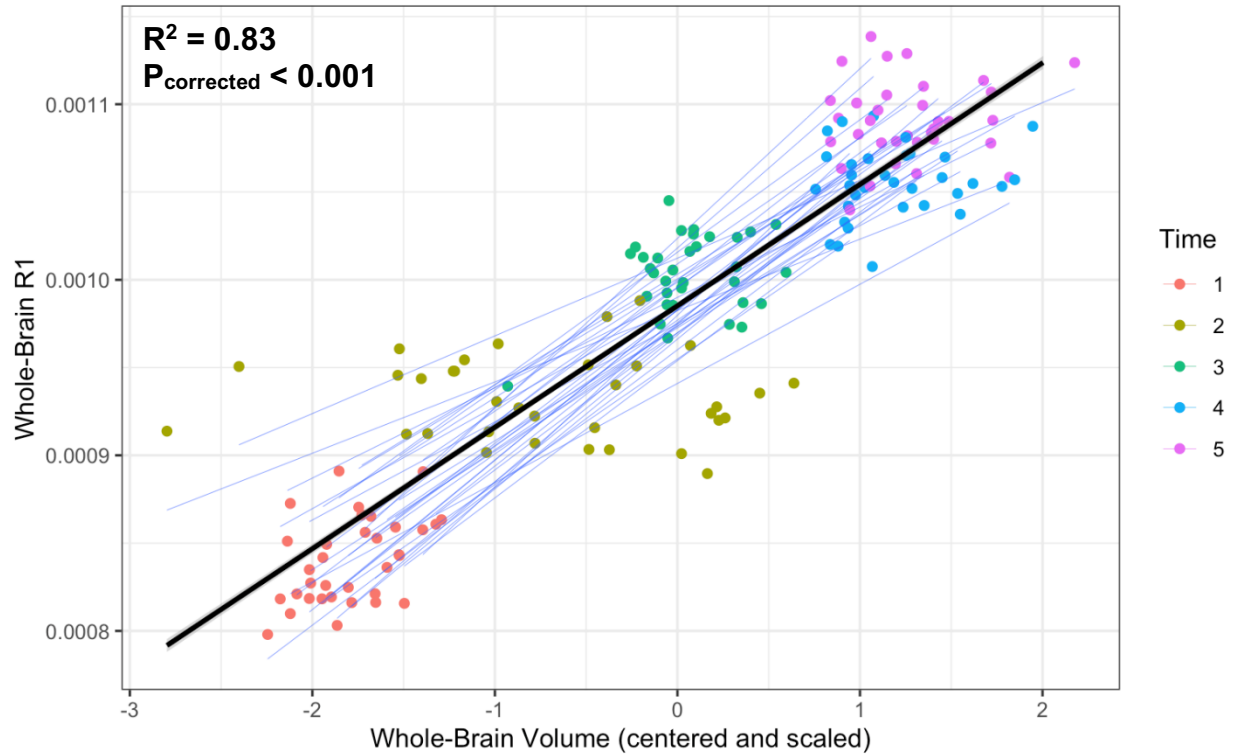

**Supplemental Figure 4. Within-subject correlation of whole-brain volume with whole-brain WM  $qR_1$ .** Blue lines represent individual subject regressions; the black line represents the average within-subject association, while controlling for gestational age at scan. Whole-brain volumes, measured in  $\text{mm}^3$ , were first scaled by dividing by 10,000 and then centered within-subject (to obtain the within-subject estimate in an LME).

### MD ~ qR1

CC

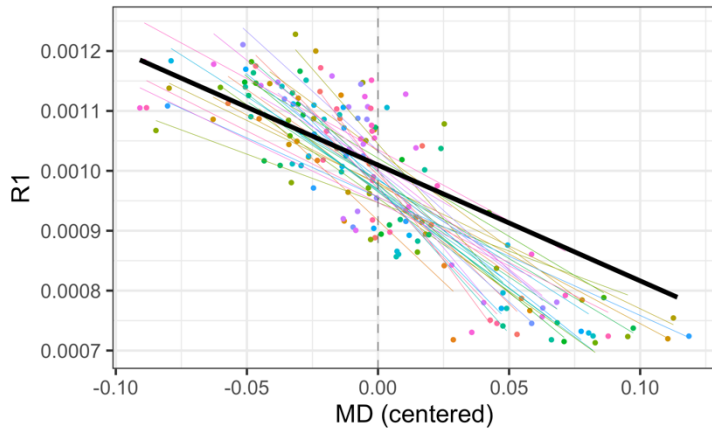

CST

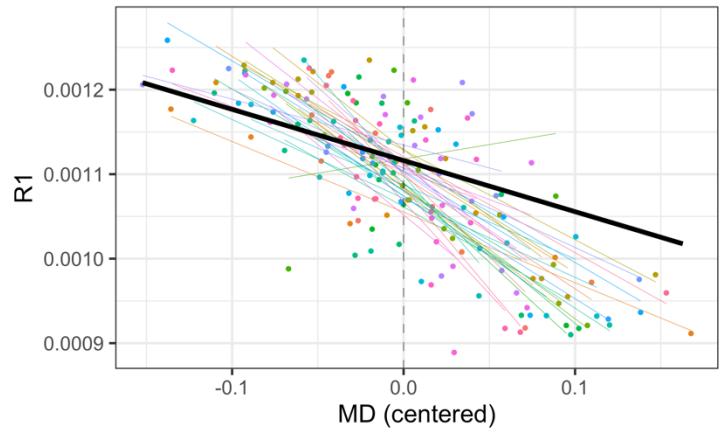

UF

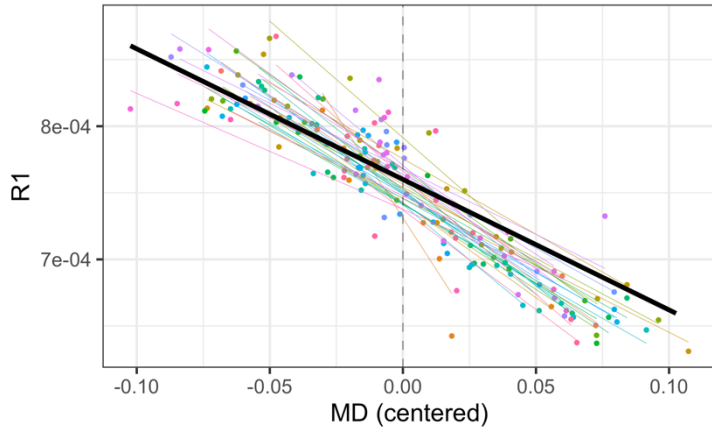

CING

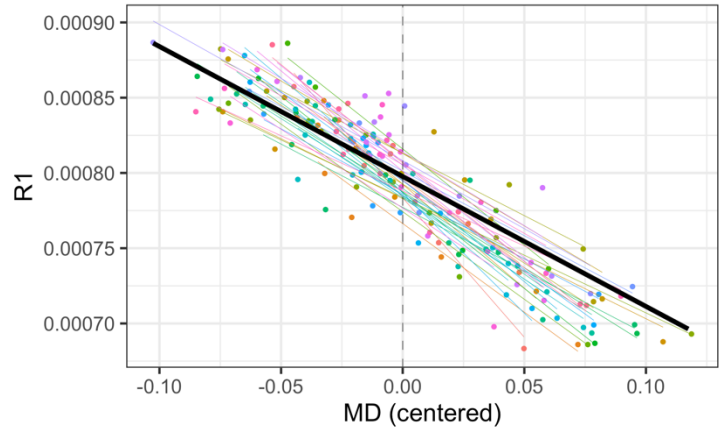

### RD ~ qR1

CC

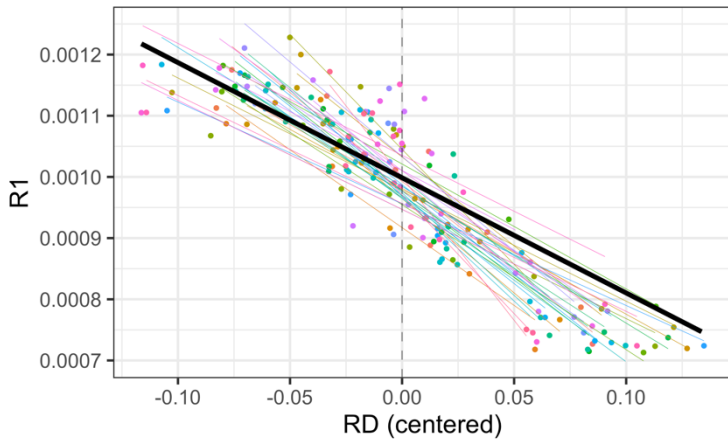

CST

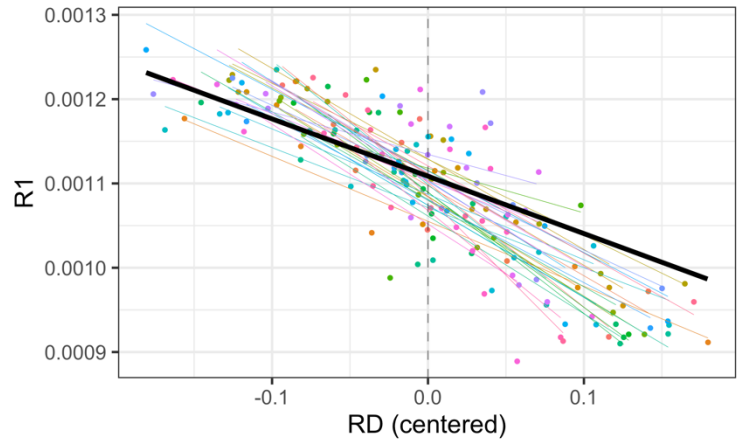

UF

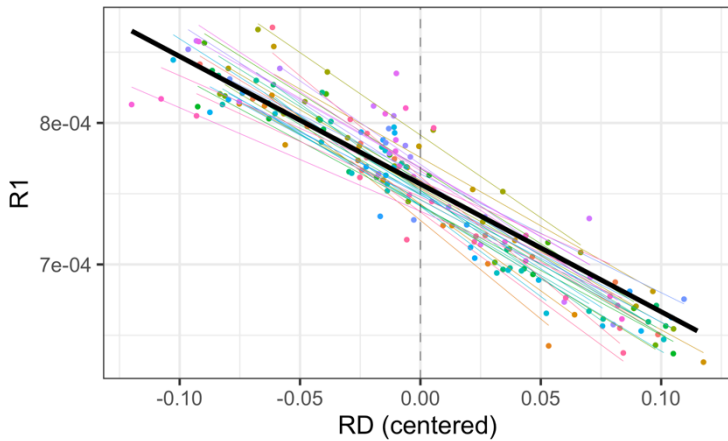

CING

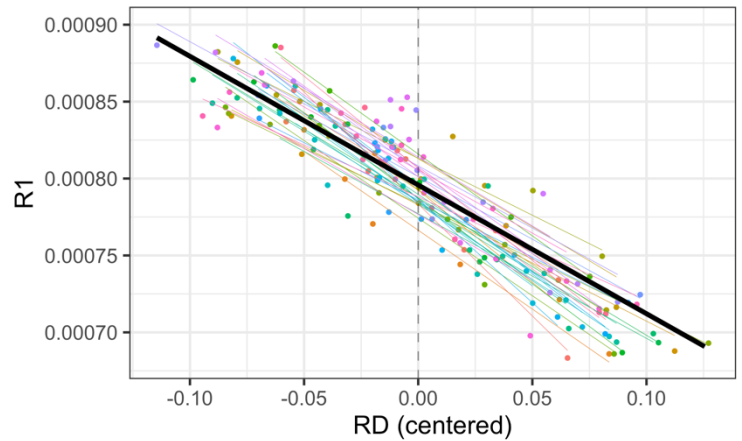

### AD ~ qR1

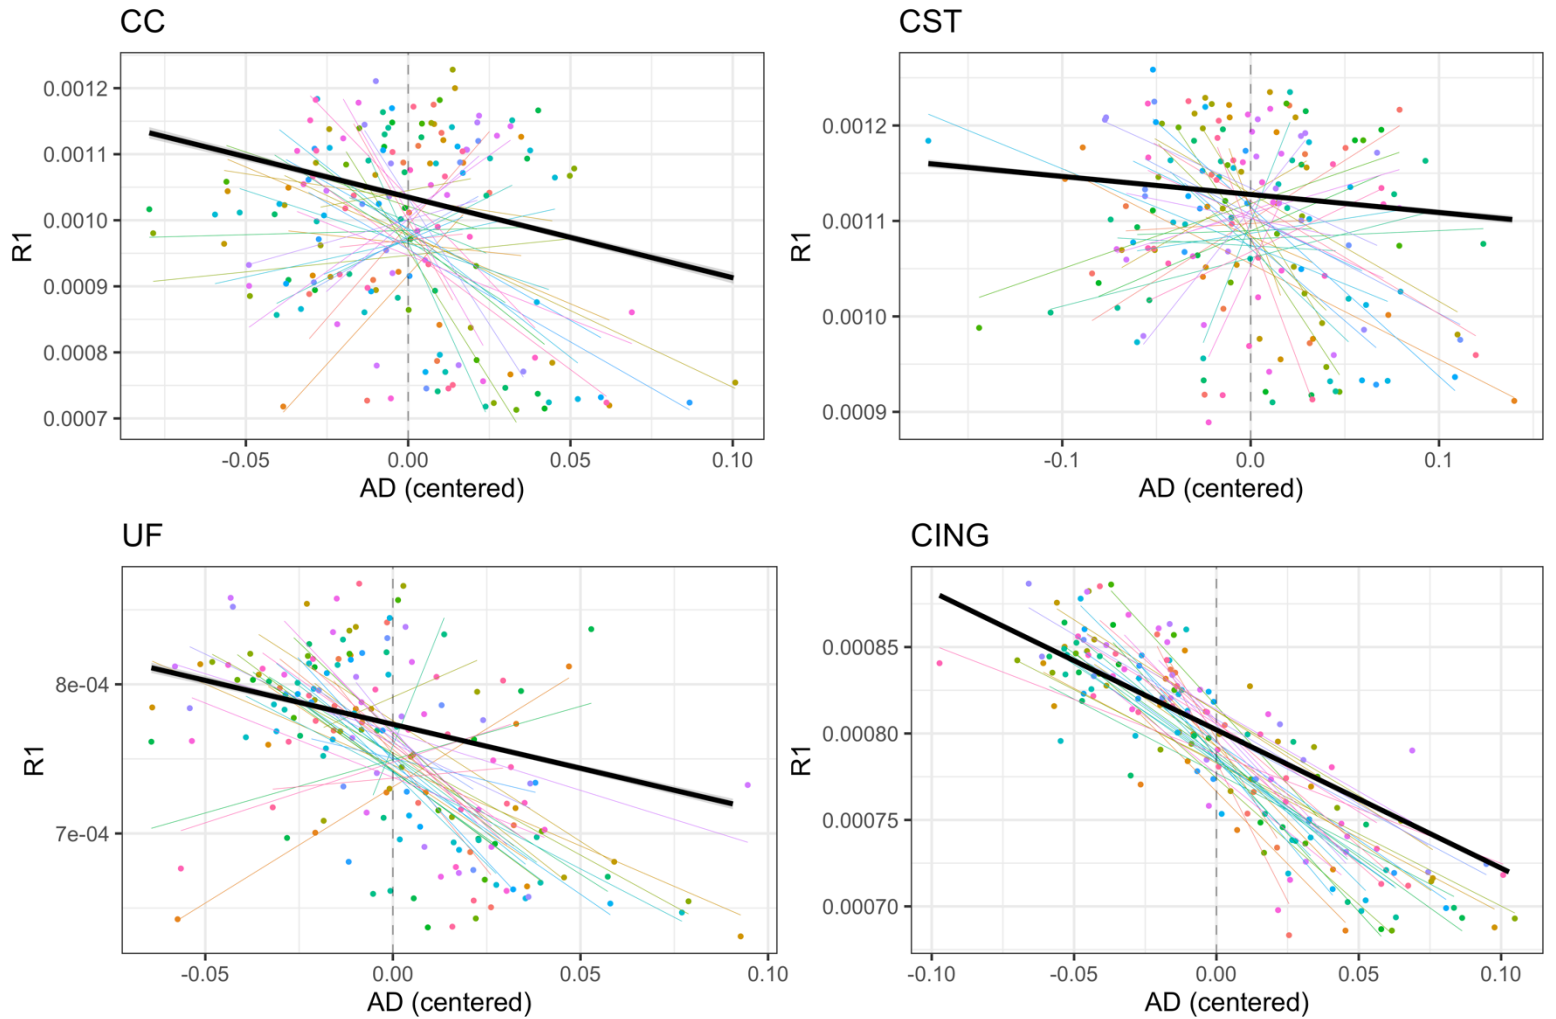

**Supplemental Figure 5. Within-subject relations between  $qR_1$  and MD, RD, and AD in 4 WM ROIs (CC, CST, UF, and CING).** In each graph, each colored line represents a subject-specific regression line predicting  $qR_1$  from within-subject centered MD, RD, or AD values, while controlling for gestational age at scan. Each point represents an individual scan, color-coded by subject. The bolded black line depicts the average within-subject relation of  $qR_1$  and MD, RD, or AD.

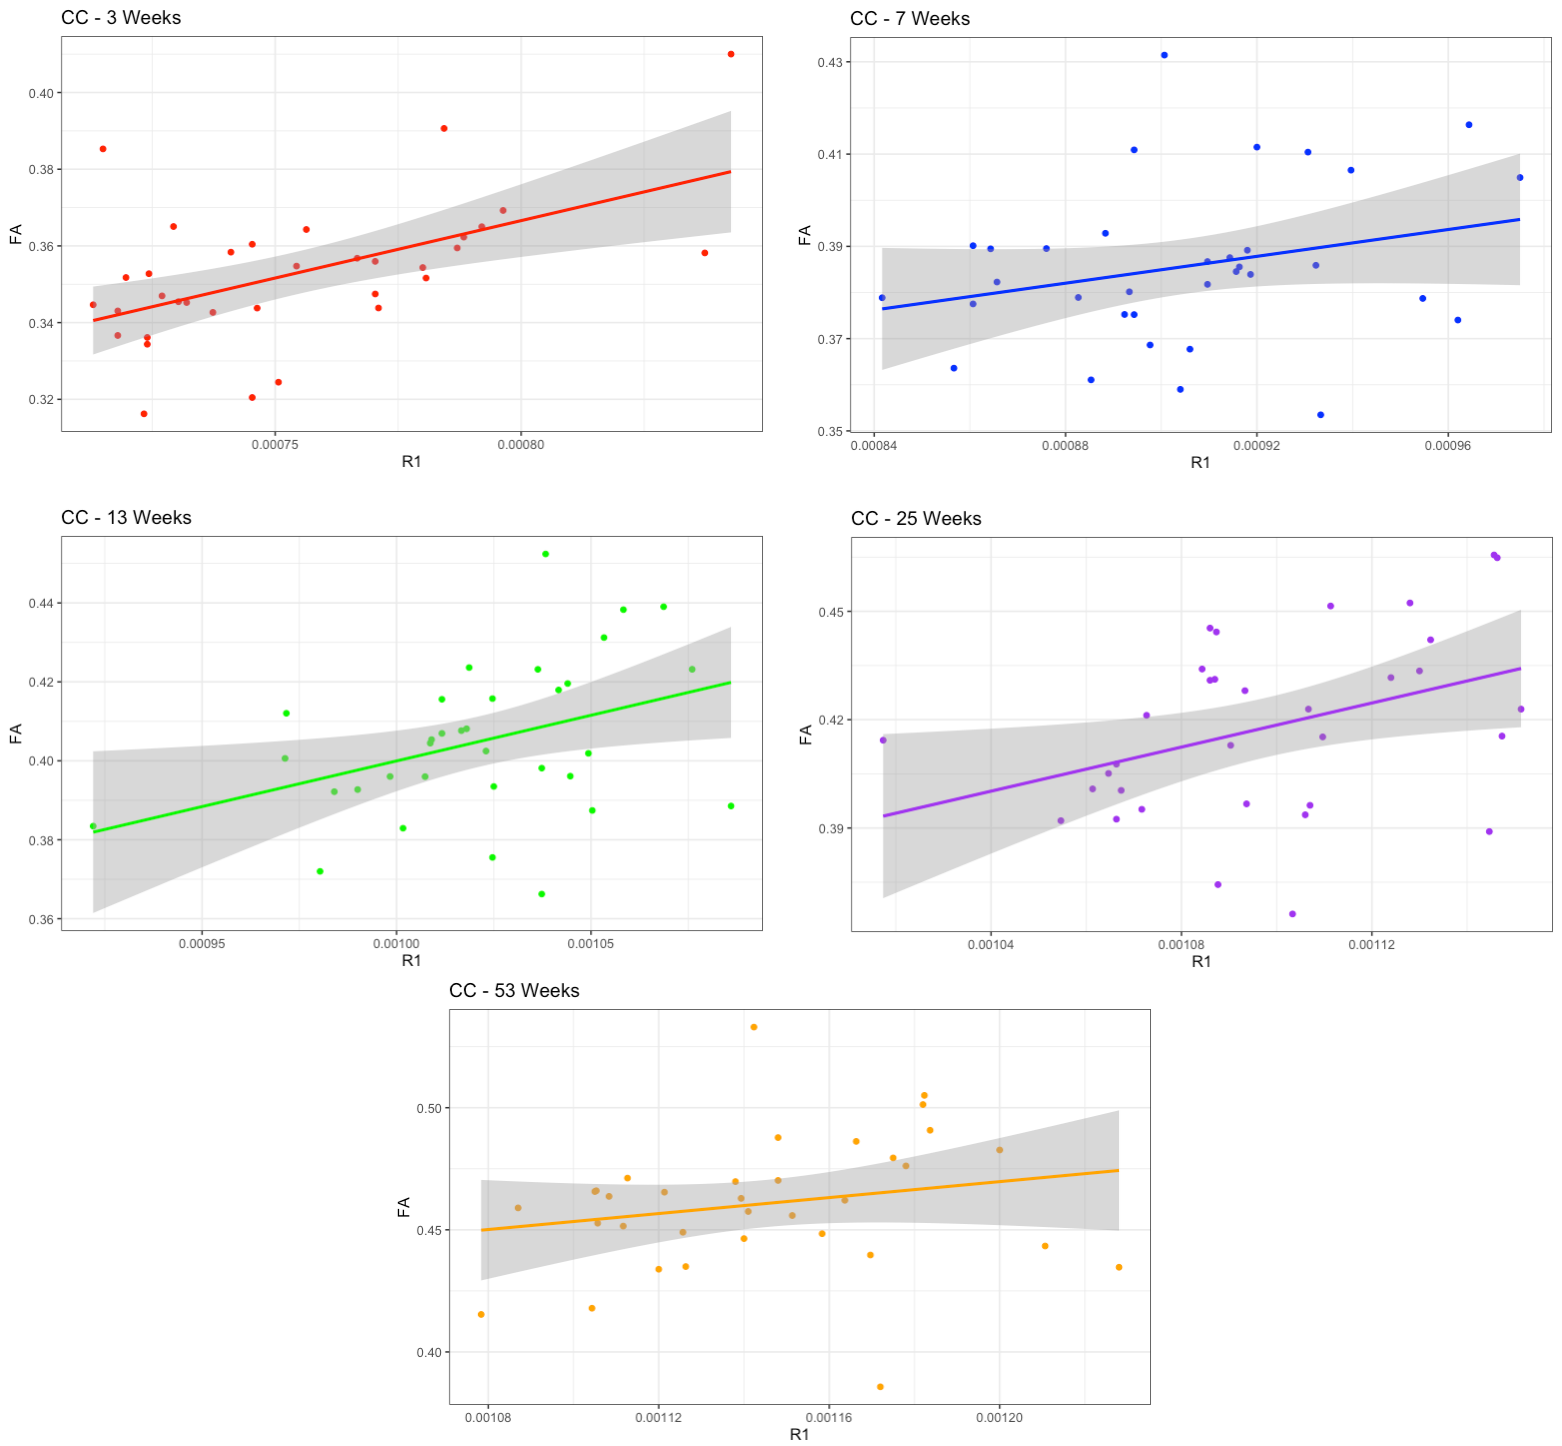

**Supplemental Figure 6. Between-subject relations between  $qR_1$  and FA in the corpus callosum (CC) at each of five study timepoints (3, 7, 13, 25, and 53 weeks of postnatal age).** In each graph, each line represents the between-subject relationship between FA and  $qR_1$ , while controlling for gestational age at scan. Each point represents an individual subject scan at the given timepoint.
